# Supplementary material for: Spliceosome-Associated microRNAs Signify Breast Cancer Cells and Portray Potential Novel Nuclear Targets
Source: PubMed Central journal article supplement (PMC7663234; doi:10.3390/ijms21218132), 2020-10-30
Supplement: ijms-21-08132-s001.pdf [file ijms-21-08132-s001.pdf]

## SUPPLEMENTARY MATERIALS

### **Spliceosome-Associated microRNAs Signify Breast Cancer Cells and Portray Potential Novel Nuclear targets**

**Shelly Mahlab-Aviv<sup>1</sup>, Keren Zohar<sup>1</sup>, Yael Cohen<sup>2</sup>, Ayelet R. Peretz<sup>2</sup>, Tsiona Eliyahu<sup>1</sup>, Michal Linial<sup>1,\*</sup> and Ruth Sperling<sup>2,\*</sup>**

**Figure S1.** Spearman rank correlation between all 9 samples of the SF-miRNA collection identified in each sample.

**Table S1.** A statistical summary of the sequencing of breast cell-lines libraries.

**Table S2.** Amounts of aligned reads from SF-miRNAs (raw data) associated with each of the nine sample preparations from three cell-lines. Source data for **Figure 2** and **Supplemental Figure S1**.

**Table S3.** A list of SF-miRNAs according to their statistical significance following normalization by DESeq2. Source for **Figure 3**, **Table 1** and **Figure 5**.

**Table S4.** List of SF-miRNA according to segmental regions of a prototype of pre-miRNAs for each of the tested cell-lines. A summary for the segmental region partition for cell-lines. Source data for **Figure 4**.

**Table S5.** Comparison of changes of 22 SF-miRNAs in the breast cell-lines with data from literature (miRCancer). Source data for **Figure 8**.

**Table S6.** Comparison of changes of 22 SF-miRNAs in the three breast cell-lines with breast cancer KM survival plots. Source data for **Figure 9**.

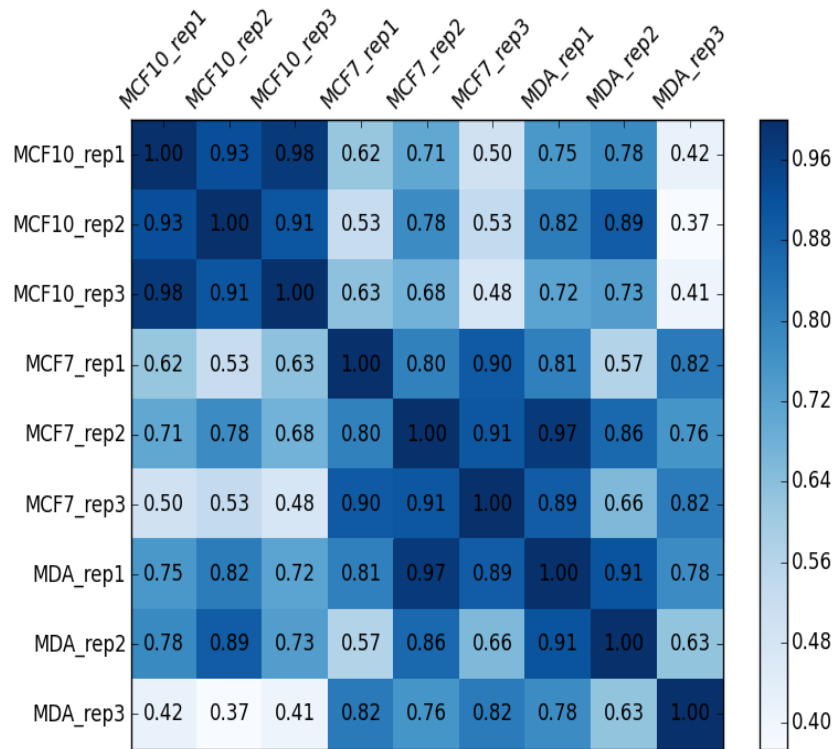

**Figure S1.** Spearman rank correlation between all 9 samples of the SF-miRNA collection identified in each sample.

**Table S1: Sequencing data for the breast cancer cell lines and replicates**

| Cell Replicates | Total reads | Mapped reads | % mapped reads | mapped to miRNA* | % of all mapped reads |
|-----------------|-------------|--------------|----------------|------------------|-----------------------|
| MCF10A rep1     | 31150316    | 19173084     | 61.6           | 10611            | 0.055343              |
| MCF10A rep2     | 33718453    | 20087790     | 59.6           | 17053            | 0.084892              |
| MCF10A rep3     | 25493755    | 14013958     | 55             | 8611             | 0.061446              |
| MCF7 rep1       | 10716584    | 2242497      | 20.9           | 3687             | 0.164415              |
| MCF7 rep2       | 6492651     | 1725734      | 26.6           | 1882             | 0.109055              |
| MCF7 rep3       | 17231509    | 2600045      | 15.1           | 2957             | 0.113729              |
| MDA-231 rep1    | 11529138    | 2852117      | 24.7           | 4078             | 0.142982              |
| MDA-231 rep2    | 17987596    | 10005933     | 55.6           | 10571            | 0.105647              |
| MDA-231 rep3    | 11800122    | 2141920      | 18.2           | 6293             | 0.293802              |

\* Reads of length  $\geq 17$  and at most 2 alignment to the genome

**Table S2:** The sum of reads associated with each of the three cell-line. Threshold  $\geq 10$  reads

| <b>Reads&gt;10</b> | <b>SUM_MCF10_TH_10_</b> | <b>SUM_MCF7_TH_10</b> | <b>SUM_MDA_TH_10_RE</b> |
|--------------------|-------------------------|-----------------------|-------------------------|
|                    | <b>READS</b>            | <b>_READS</b>         | <b>ADS</b>              |
| hsa-mir-21         | 1293                    | 2496                  | 5644                    |
| hsa-mir-6087       | 20334                   | 2422                  | 3343                    |
| hsa-mir-100        | 45                      | 0                     | 2487                    |
| hsa-let-7f-1       | 190                     | 198                   | 927                     |
| hsa-let-7f-2       | 112                     | 187                   | 860                     |
| hsa-let-7g         | 73                      | 191                   | 695                     |
| hsa-let-7i         | 76                      | 138                   | 661                     |
| hsa-mir-222        | 23                      | 0                     | 527                     |
| hsa-mir-30a        | 19                      | 0                     | 473                     |
| hsa-mir-221        | 29                      | 0                     | 349                     |
| hsa-mir-20a        | 47                      | 110                   | 239                     |
| hsa-mir-19b-1      | 43                      | 127                   | 238                     |
| hsa-mir-92a-1      | 33                      | 36                    | 188                     |
| hsa-mir-24-2       | 44                      | 16                    | 181                     |
| hsa-mir-24-1       | 95                      | 18                    | 178                     |
| hsa-mir-92a-2      | 28                      | 15                    | 157                     |
| hsa-mir-1246       | 1814                    | 189                   | 144                     |
| hsa-mir-27b        | 53                      | 0                     | 136                     |
| hsa-mir-26a-2      | 42                      | 22                    | 119                     |
| hsa-mir-26a-1      | 45                      | 22                    | 118                     |
| hsa-mir-30d        | 45                      | 65                    | 100                     |
| hsa-mir-7704       | 1167                    | 80                    | 94                      |
| hsa-mir-1307       | 16                      | 43                    | 84                      |
| hsa-mir-622        | 195                     | 162                   | 78                      |
| hsa-mir-103a-1     | 36                      | 17                    | 76                      |
| hsa-mir-151a       | 37                      | 31                    | 75                      |
| hsa-mir-103a-2     | 39                      | 20                    | 74                      |
| hsa-mir-25         | 10                      | 35                    | 73                      |
| hsa-let-7b         | 61                      | 21                    | 71                      |
| hsa-mir-99b        | 23                      | 37                    | 69                      |
| hsa-mir-4426       | 126                     | 14                    | 66                      |
| hsa-mir-423        | 27                      | 38                    | 65                      |
| hsa-mir-125b-1     | 0                       | 0                     | 64                      |
| hsa-mir-1291       | 312                     | 340                   | 59                      |
| hsa-mir-320a       | 12                      | 25                    | 56                      |
| hsa-mir-23a        | 14                      | 0                     | 53                      |
| hsa-mir-10a        | 0                       | 0                     | 52                      |
| hsa-mir-125b-2     | 0                       | 0                     | 51                      |
| hsa-mir-3687       | 1595                    | 71                    | 46                      |
| hsa-mir-3064       | 642                     | 105                   | 42                      |
| hsa-mir-98         | 16                      | 13                    | 40                      |
| hsa-mir-29a        | 27                      | 0                     | 39                      |
| hsa-mir-30c-1      | 12                      | 0                     | 39                      |
| hsa-mir-30c-2      | 0                       | 0                     | 39                      |
| hsa-mir-182        | 38                      | 71                    | 36                      |
| hsa-mir-15a        | 42                      | 27                    | 33                      |
| hsa-mir-3654       | 91                      | 22                    | 33                      |

|                |      |    |    |
|----------------|------|----|----|
| hsa-mir-148b   | 0    | 0  | 33 |
| hsa-mir-191    | 15   | 0  | 32 |
| hsa-mir-22     | 15   | 0  | 32 |
| hsa-mir-425    | 0    | 0  | 30 |
| hsa-mir-181a-1 | 45   | 0  | 29 |
| hsa-mir-6515   | 152  | 27 | 28 |
| hsa-mir-584    | 0    | 0  | 27 |
| hsa-mir-146a   | 0    | 0  | 26 |
| hsa-mir-92b    | 0    | 0  | 26 |
| hsa-mir-224    | 22   | 0  | 25 |
| hsa-mir-183    | 15   | 31 | 24 |
| hsa-mir-3607   | 185  | 26 | 24 |
| hsa-mir-27a    | 11   | 0  | 24 |
| hsa-let-7d     | 0    | 0  | 24 |
| hsa-let-7e     | 66   | 24 | 23 |
| hsa-mir-1248   | 255  | 10 | 23 |
| hsa-mir-4709   | 57   | 0  | 21 |
| hsa-mir-30e    | 0    | 0  | 21 |
| hsa-mir-200b   | 0    | 27 | 20 |
| hsa-mir-3198-2 | 35   | 13 | 20 |
| hsa-mir-612    | 1494 | 0  | 20 |
| hsa-mir-128-1  | 0    | 0  | 20 |
| hsa-mir-23b    | 57   | 0  | 19 |
| hsa-mir-17     | 0    | 0  | 18 |
| hsa-mir-492    | 0    | 49 | 17 |
| hsa-mir-574    | 0    | 0  | 17 |
| hsa-mir-93     | 16   | 13 | 16 |
| hsa-mir-125a   | 25   | 0  | 16 |
| hsa-mir-148a   | 170  | 69 | 15 |
| hsa-mir-378c   | 13   | 11 | 15 |
| hsa-mir-18a    | 0    | 0  | 15 |
| hsa-mir-744    | 0    | 15 | 14 |
| hsa-mir-7705   | 27   | 0  | 14 |
| hsa-mir-6819   | 16   | 0  | 14 |
| hsa-mir-181a-2 | 0    | 0  | 14 |
| hsa-mir-16-2   | 0    | 0  | 14 |
| hsa-mir-6840   | 85   | 21 | 13 |
| hsa-mir-106b   | 0    | 10 | 13 |
| hsa-mir-29b-2  | 41   | 0  | 13 |
| hsa-mir-198    | 11   | 0  | 13 |
| hsa-mir-99a    | 0    | 0  | 13 |
| hsa-mir-16-1   | 0    | 0  | 13 |
| hsa-mir-140    | 0    | 0  | 12 |
| hsa-mir-7-1    | 0    | 0  | 12 |
| hsa-let-7a-2   | 0    | 0  | 12 |
| hsa-mir-3609   | 0    | 20 | 11 |
| hsa-mir-26b    | 10   | 0  | 11 |
| hsa-mir-7110   | 0    | 0  | 11 |
| hsa-mir-126    | 0    | 0  | 11 |
| hsa-mir-361    | 0    | 0  | 11 |

|                |     |    |    |
|----------------|-----|----|----|
| hsa-mir-671    | 43  | 0  | 10 |
| hsa-mir-4761   | 30  | 0  | 10 |
| hsa-mir-181b-2 | 0   | 0  | 10 |
| hsa-mir-101-1  | 0   | 0  | 10 |
| hsa-mir-218-1  | 0   | 0  | 10 |
| hsa-mir-5047   | 542 | 33 | 0  |
| hsa-mir-200c   | 71  | 32 | 0  |
| hsa-mir-200a   | 0   | 20 | 0  |
| hsa-mir-4664   | 63  | 16 | 0  |
| hsa-mir-6811   | 0   | 15 | 0  |
| hsa-mir-296    | 0   | 11 | 0  |
| hsa-mir-7161   | 249 | 0  | 0  |
| hsa-mir-205    | 153 | 0  | 0  |
| hsa-mir-147b   | 138 | 0  | 0  |
| hsa-mir-3648   | 132 | 0  | 0  |
| hsa-mir-6849   | 111 | 0  | 0  |
| hsa-mir-6887   | 77  | 0  | 0  |
| hsa-mir-555    | 77  | 0  | 0  |
| hsa-mir-1306   | 70  | 0  | 0  |
| hsa-let-7a-1   | 63  | 0  | 0  |
| hsa-mir-663a   | 62  | 0  | 0  |
| hsa-mir-4461   | 52  | 0  | 0  |
| hsa-mir-3916   | 51  | 0  | 0  |
| hsa-mir-8075   | 49  | 0  | 0  |
| hsa-mir-614    | 46  | 0  | 0  |
| hsa-mir-664a   | 41  | 0  | 0  |
| hsa-mir-7706   | 37  | 0  | 0  |
| hsa-mir-6504   | 36  | 0  | 0  |
| hsa-let-7a-3   | 36  | 0  | 0  |
| hsa-mir-6775   | 36  | 0  | 0  |
| hsa-mir-640    | 35  | 0  | 0  |
| hsa-mir-3605   | 29  | 0  | 0  |
| hsa-mir-663b   | 28  | 0  | 0  |
| hsa-mir-4485   | 27  | 0  | 0  |
| hsa-mir-4723   | 25  | 0  | 0  |
| hsa-mir-6866   | 24  | 0  | 0  |
| hsa-mir-4680   | 24  | 0  | 0  |
| hsa-mir-1204   | 22  | 0  | 0  |
| hsa-mir-4712   | 21  | 0  | 0  |
| hsa-mir-626    | 21  | 0  | 0  |
| hsa-mir-922    | 21  | 0  | 0  |
| hsa-mir-6764   | 20  | 0  | 0  |
| hsa-mir-5689   | 20  | 0  | 0  |
| hsa-mir-3652   | 19  | 0  | 0  |
| hsa-mir-6837   | 19  | 0  | 0  |
| hsa-mir-6865   | 19  | 0  | 0  |
| hsa-mir-4647   | 19  | 0  | 0  |
| hsa-mir-6742   | 18  | 0  | 0  |
| hsa-mir-29c    | 18  | 0  | 0  |
| hsa-mir-937    | 18  | 0  | 0  |

|                |    |   |   |
|----------------|----|---|---|
| hsa-mir-6848   | 18 | 0 | 0 |
| hsa-mir-4730   | 17 | 0 | 0 |
| hsa-mir-6851   | 16 | 0 | 0 |
| hsa-mir-6510   | 16 | 0 | 0 |
| hsa-mir-4687   | 16 | 0 | 0 |
| hsa-mir-7113   | 16 | 0 | 0 |
| hsa-mir-645    | 15 | 0 | 0 |
| hsa-mir-378h   | 15 | 0 | 0 |
| hsa-mir-6824   | 15 | 0 | 0 |
| hsa-mir-197    | 15 | 0 | 0 |
| hsa-mir-8086   | 15 | 0 | 0 |
| hsa-mir-4435-1 | 14 | 0 | 0 |
| hsa-mir-4435-2 | 14 | 0 | 0 |
| hsa-mir-647    | 14 | 0 | 0 |
| hsa-mir-4700   | 14 | 0 | 0 |
| hsa-mir-3118-2 | 14 | 0 | 0 |
| hsa-mir-4701   | 14 | 0 | 0 |
| hsa-mir-6723   | 13 | 0 | 0 |
| hsa-mir-3940   | 13 | 0 | 0 |
| hsa-mir-877    | 12 | 0 | 0 |
| hsa-mir-5088   | 12 | 0 | 0 |
| hsa-mir-3198-1 | 12 | 0 | 0 |
| hsa-mir-571    | 12 | 0 | 0 |
| hsa-mir-6501   | 12 | 0 | 0 |
| hsa-mir-623    | 12 | 0 | 0 |
| hsa-mir-1825   | 12 | 0 | 0 |
| hsa-mir-4477b  | 12 | 0 | 0 |
| hsa-mir-4673   | 11 | 0 | 0 |
| hsa-mir-3651   | 11 | 0 | 0 |
| hsa-mir-2110   | 11 | 0 | 0 |
| hsa-mir-452    | 10 | 0 | 0 |
| hsa-mir-545    | 10 | 0 | 0 |
| hsa-mir-6516   | 10 | 0 | 0 |
| hsa-mir-632    | 10 | 0 | 0 |
| hsa-mir-590    | 10 | 0 | 0 |
| hsa-mir-2355   | 10 | 0 | 0 |
| hsa-mir-378d-2 | 10 | 0 | 0 |
| hsa-mir-4640   | 10 | 0 | 0 |
| hsa-mir-8066   | 10 | 0 | 0 |
| hsa-mir-644a   | 10 | 0 | 0 |
| hsa-mir-6859-2 | 10 | 0 | 0 |
| hsa-mir-3614   | 10 | 0 | 0 |
| hsa-mir-4800   | 10 | 0 | 0 |
| hsa-mir-6859-1 | 10 | 0 | 0 |

**Table S3.** Statistically significant DESeq2 analysis

| miRNA          | baseMean   | log2FoldChange | lfcSE      | stat       | pvalue     | padj              |
|----------------|------------|----------------|------------|------------|------------|-------------------|
| hsa-mir-6087   | 2558.89802 | -3.0521954     | 0.49515467 | 43.6657604 | 3.30E-10   | <b>4.74E-09</b>   |
| hsa-mir-21     | 897.111909 | 1.67098614     | 0.3170605  | 31.8807457 | 1.19E-07   | <b>1.06E-06</b>   |
| hsa-mir-1246   | 200.157887 | -3.9417058     | 0.5636884  | 48.9613135 | 2.33E-11   | <b>3.97E-10</b>   |
| hsa-mir-100    | 165.493465 | 5.22001233     | 0.41573157 | 306.722586 | 2.49E-67   | <b>4.65E-65</b>   |
| hsa-mir-3687   | 167.8572   | -5.7728652     | 0.72686862 | 60.6722535 | 6.69E-14   | <b>1.39E-12</b>   |
| hsa-mir-612    | 151.688222 | -7.026533      | 0.66299282 | 161.196522 | 9.92E-36   | <b>9.28E-34</b>   |
| hsa-mir-7704   | 119.490449 | -3.8877571     | 0.7597268  | 28.3284397 | 7.06E-07   | <b>5.07E-06</b>   |
| hsa-let-7f-1   | 109.765431 | 1.77147391     | 0.32407778 | 30.7989887 | 2.05E-07   | <b>1.67E-06</b>   |
| hsa-mir-3064   | 83.8800941 | -4.497302      | 0.5844071  | 53.6927804 | 2.19E-12   | <b>4.10E-11</b>   |
| hsa-let-7f-2   | 97.11638   | 2.43060472     | 0.34569813 | 47.6459745 | 4.51E-11   | <b>7.02E-10</b>   |
| hsa-let-7g     | 91.9128119 | 3.05378696     | 0.57657209 | 25.0038973 | 3.72E-06   | <b>2.58E-05</b>   |
| hsa-mir-5047   | 59.8564654 | -6.7981308     | 0.77072614 | 96.1243485 | 1.34E-21   | <b>6.26E-20</b>   |
| hsa-let-7i     | 74.5873251 | 2.71177463     | 0.46710245 | 32.0203392 | 1.11E-07   | <b>1.04E-06</b>   |
| hsa-mir-222    | 37.3028832 | 4.01289566     | 0.53763086 | 126.009282 | 4.34E-28   | <b>2.70E-26</b>   |
| hsa-mir-1291   | 83.5139685 | -2.6325279     | 0.52837151 | 35.8479575 | 1.64E-08   | <b>1.71E-07</b>   |
| hsa-mir-30a    | 32.3578899 | 4.10061265     | 0.67499463 | 73.6398571 | 1.02E-16   | <b>2.73E-15</b>   |
| hsa-mir-7161   | 25.9661352 | -5.700116      | 0.81883928 | 75.1278723 | 4.86E-17   | <b>1.51E-15</b>   |
| hsa-mir-1248   | 25.5229935 | -3.7093356     | 0.73681834 | 37.0434482 | 9.04E-09   | <b>1.06E-07</b>   |
| hsa-mir-622    | 48.5234195 | -1.7411792     | 0.45331477 | 22.4968147 | 1.30E-05   | <b>8.70E-05</b>   |
| hsa-mir-221    | 22.7372138 | 2.83353003     | 0.60822213 | 66.8132576 | 3.10E-15   | <b>7.25E-14</b>   |
| hsa-mir-24-1   | 25.8488677 | 0.5606365      | 0.65763848 | 8.07251605 | 0.01766345 | <b>0.04587589</b> |
| hsa-mir-20a    | 39.7818953 | 1.78265597     | 0.66753775 | 8.2620934  | 0.01606605 | <b>0.04231482</b> |
| hsa-mir-19b-1  | 41.5747357 | 1.88088387     | 0.73600475 | 8.29326586 | 0.01581759 | <b>0.04225555</b> |
| hsa-mir-3607   | 24.0448261 | -3.6474937     | 0.66821249 | 32.9904856 | 6.86E-08   | <b>6.75E-07</b>   |
| hsa-mir-6515   | 22.3309069 | -2.7896507     | 0.80619426 | 12.9807118 | 0.00151801 | <b>0.00550476</b> |
| hsa-mir-24-2   | 20.5646833 | 1.73067526     | 0.65982852 | 12.9274075 | 0.00155901 | <b>0.00550476</b> |
| hsa-mir-148a   | 27.933263  | -3.7922436     | 0.62182069 | 35.8773707 | 1.62E-08   | <b>1.71E-07</b>   |
| hsa-mir-4426   | 18.4857731 | -1.3369762     | 0.52533812 | 17.0521214 | 0.00019823 | <b>0.00092675</b> |
| hsa-mir-92a-1  | 21.1078471 | 1.96318601     | 0.58790355 | 12.1170093 | 0.00233789 | <b>0.00794884</b> |
| hsa-mir-147b   | 13.4614296 | -5.684554      | 0.95144271 | 76.1180195 | 2.96E-17   | <b>1.11E-15</b>   |
| hsa-mir-92a-2  | 15.6407616 | 1.90848473     | 0.57718836 | 17.5499736 | 0.00015455 | <b>0.00080281</b> |
| hsa-mir-27b    | 14.0284887 | 0.62402176     | 0.70110245 | 10.6109094 | 0.00496444 | <b>0.01600604</b> |
| hsa-mir-6849   | 12.7276706 | -4.5778464     | 0.96352422 | 30.9490671 | 1.90E-07   | <b>1.62E-06</b>   |
| hsa-mir-3654   | 13.565232  | -2.3331341     | 0.77781859 | 9.81539163 | 0.0073895  | <b>0.02228767</b> |
| hsa-mir-6840   | 13.3780225 | -3.221585      | 0.79398987 | 16.1463208 | 3.12E-04   | <b>0.00138824</b> |
| hsa-mir-1306   | 8.55367674 | -4.3451392     | 1.08536659 | 20.7513788 | 3.12E-05   | <b>0.0001993</b>  |
| hsa-mir-555    | 8.71815176 | -5.7080609     | 1.16346843 | 38.1809995 | 5.12E-09   | <b>6.38E-08</b>   |
| hsa-mir-1307   | 14.5196638 | 1.99800785     | 0.73747112 | 9.55295047 | 0.00842565 | <b>0.02423993</b> |
| hsa-mir-4709   | 7.35738428 | -1.8379158     | 0.83783876 | 13.0933749 | 0.00143486 | <b>0.00536638</b> |
| hsa-let-7a-1   | 7.5568804  | -3.5114896     | 0.89654823 | 20.115463  | 4.29E-05   | <b>0.0002585</b>  |
| hsa-mir-23b    | 7.3719498  | -2.4809388     | 0.99669054 | 11.0930113 | 0.00390107 | <b>0.01279823</b> |
| hsa-mir-200c   | 11.5571139 | -5.6434554     | 1.22012687 | 30.6993039 | 2.16E-07   | <b>1.68E-06</b>   |
| hsa-mir-663a   | 6.26593046 | -5.3421453     | 1.2547554  | 29.9559166 | 3.13E-07   | <b>2.34E-06</b>   |
| hsa-mir-182    | 16.072265  | -0.6584059     | 0.61301425 | 15.5761506 | 0.00041465 | <b>0.00180325</b> |
| hsa-mir-3916   | 6.83768061 | -3.0392145     | 0.8962524  | 14.0660583 | 0.00088226 | <b>0.00351025</b> |
| hsa-mir-25     | 10.6307751 | 2.11393896     | 0.7641579  | 10.1488088 | 0.00625481 | <b>0.01949416</b> |
| hsa-mir-671    | 5.89671512 | -2.3466503     | 0.98156171 | 9.59291573 | 0.00825895 | <b>0.02413162</b> |
| hsa-mir-29a    | 5.37515051 | -0.0325122     | 0.86181301 | 14.2828141 | 0.00079164 | <b>0.00321818</b> |
| hsa-mir-4461   | 6.7136104  | -4.3286761     | 1.12156324 | 17.0539698 | 1.98E-04   | <b>0.00092675</b> |
| hsa-mir-8075   | 5.23661261 | -5.3795268     | 1.51443751 | 19.9690959 | 4.61E-05   | <b>0.00026944</b> |
| hsa-mir-29b-2  | 4.74801898 | -2.5682561     | 1.05484747 | 17.1310994 | 0.00019056 | <b>0.00092675</b> |
| hsa-mir-614    | 4.97604822 | -3.6571646     | 1.0190484  | 20.7012305 | 3.20E-05   | <b>0.0001993</b>  |
| hsa-mir-125b-1 | 4.1894403  | 2.42495624     | 1.03116321 | 17.3768209 | 0.00016853 | <b>0.00085175</b> |
| hsa-mir-224    | 3.96486423 | -0.4680097     | 1.03875754 | 10.0238372 | 0.00665812 | <b>0.02041095</b> |

|                |            |            |            |            |            |                   |
|----------------|------------|------------|------------|------------|------------|-------------------|
| hsa-mir-6775   | 4.19329523 | -5.5523401 | 1.66277778 | 13.3180793 | 0.00128238 | <b>0.00489397</b> |
| hsa-mir-664a   | 4.1638028  | -3.8771537 | 1.20838349 | 15.4982575 | 0.00043112 | <b>0.00180739</b> |
| hsa-mir-10a    | 4.13335409 | 3.53845327 | 1.16786508 | 13.8395466 | 0.00098805 | <b>0.00384929</b> |
| hsa-mir-4723   | 3.0341914  | -3.1993155 | 1.37623385 | 11.8397824 | 0.00268549 | <b>0.00896763</b> |
| hsa-mir-3605   | 2.966161   | -5.2481077 | 1.61903352 | 17.6583134 | 0.0001464  | <b>0.0007822</b>  |
| hsa-mir-663b   | 2.90468425 | -4.1177551 | 1.43105377 | 15.4806364 | 0.00043493 | <b>0.00180739</b> |
| hsa-mir-183    | 7.98651124 | 0.19847746 | 0.80884006 | 7.8869112  | 0.01938113 | <b>0.04964754</b> |
| hsa-mir-125b-2 | 2.7294829  | 3.83019682 | 1.5848312  | 12.9259161 | 0.00156017 | <b>0.00550476</b> |
| hsa-mir-4485   | 2.59642701 | -4.9728624 | 1.58895595 | 16.2769656 | 0.00029208 | <b>0.00133217</b> |
| hsa-mir-4680   | 2.25153631 | -4.2003124 | 1.61331845 | 12.5794238 | 0.00185529 | <b>0.00642482</b> |
| hsa-mir-922    | 2.21129961 | -3.6903587 | 1.67397767 | 9.61761314 | 0.00815759 | <b>0.02413162</b> |
| hsa-mir-6848   | 2.07279728 | -3.84454   | 1.70554097 | 9.46328768 | 0.00881197 | <b>0.02496726</b> |
| hsa-mir-3652   | 2.91661523 | -4.5999267 | 1.6331325  | 8.40654442 | 0.01494659 | <b>0.04050742</b> |
| hsa-mir-29c    | 1.89668112 | -3.9444462 | 1.74527479 | 9.39845678 | 0.0091023  | <b>0.02540492</b> |
| hsa-mir-584    | 1.89561165 | 3.08258121 | 1.61301866 | 8.60089766 | 0.01356247 | <b>0.03729679</b> |
| hsa-let-7d     | 2.66152338 | 4.85209462 | 1.55898666 | 10.3174    | 0.00574917 | <b>0.01822194</b> |
| hsa-mir-492    | 9.29818331 | 3.43663808 | 1.36591068 | 41.6775322 | 8.91E-10   | <b>1.19E-08</b>   |
| hsa-mir-200b   | 5.73063218 | 3.48205995 | 1.4565434  | 19.1914229 | 6.80E-05   | <b>0.00037411</b> |
| hsa-mir-200a   | 3.58050777 | 0.91656333 | 1.70335893 | 19.2977725 | 6.45E-05   | <b>0.00036549</b> |

**Table S4. Fraction of Mature of the other aligned reads by segmental region**

|                      | MCF10A   | MCF7     | MDA-231  |
|----------------------|----------|----------|----------|
| extension            | 13.89187 | 9.078925 | 8.727222 |
| mature               | 25.44188 | 60.04101 | 68.23237 |
| undefined complement | 0.985612 | 1.026544 | 0.626379 |
| hairpin precursor    | 3.027587 | 2.240941 | 1.245125 |
| overlap region       | 56.65305 | 27.61258 | 21.1689  |

Removed extension that are beyond the complete hairpin pre-miRNA



**Table S5.** SF-miRNA expression in view of miRcancer

| Names        | padj     | Aver MCF-10A | Aver MCF-7 | Aver MDA-MB-231 | ratio MDA/MCF-10A | ratio MCF-10A/MDA |
|--------------|----------|--------------|------------|-----------------|-------------------|-------------------|
| hsa-mir-612  | 9.28E-34 | 450.45       | 1.57       | 3.05            | 0.007             | 147.920           |
| hsa-mir-5047 | 6.26E-20 | 163.84       | 14.51      | 1.21            | 0.007             | 135.210           |
| hsa-mir-7161 | 1.51E-15 | 74.73        | 1.94       | 1.23            | 0.016             | 60.874            |
| hsa-mir-3687 | 1.39E-12 | 460.56       | 34.85      | 8.16            | 0.018             | 56.466            |
| hsa-mir-3064 | 4.10E-11 | 196.59       | 46.28      | 8.78            | 0.045             | 22.395            |
| hsa-mir-1246 | 3.97E-10 | 484.63       | 83.84      | 32.00           | 0.066             | 15.144            |
| hsa-mir-7704 | 5.07E-06 | 296.40       | 41.85      | 20.23           | 0.068             | 14.654            |
| hsa-mir-3607 | 6.75E-07 | 56.98        | 10.82      | 4.34            | 0.076             | 13.138            |
| hsa-mir-1248 | 1.06E-07 | 66.78        | 4.54       | 5.25            | 0.079             | 12.719            |
| hsa-mir-148a | 1.71E-07 | 47.42        | 32.41      | 3.97            | 0.084             | 11.930            |
| hsa-mir-6087 | 4.74E-09 | 5847.12      | 1124.30    | 705.28          | 0.121             | 8.291             |
| hsa-mir-1291 | 1.71E-07 | 88.03        | 147.59     | 14.91           | 0.169             | 5.903             |
| hsa-mir-622  | 8.70E-05 | 54.58        | 74.17      | 16.81           | 0.308             | 3.246             |
| hsa-mir-21   | 1.06E-06 | 362.56       | 1173.27    | 1155.51         | 3.187             | 0.314             |
| hsa-let-7f-1 | 1.67E-06 | 54.02        | 90.58      | 184.70          | 3.419             | 0.292             |
| hsa-let-7f-2 | 7.02E-10 | 32.11        | 85.99      | 173.25          | 5.395             | 0.185             |
| hsa-let-7i   | 1.04E-06 | 21.19        | 62.31      | 140.25          | 6.618             | 0.151             |
| hsa-mir-221  | 7.25E-14 | 8.52         | 0.00       | 59.69           | 7.007             | 0.143             |
| hsa-let-7g   | 2.58E-05 | 20.37        | 84.80      | 170.57          | 8.372             | 0.119             |
| hsa-mir-222  | 2.70E-26 | 6.46         | 0.00       | 105.45          | 16.328            | 0.061             |
| hsa-mir-30a  | 2.73E-15 | 5.23         | 0.77       | 91.07           | 17.397            | 0.057             |
| hsa-mir-100  | 4.65E-65 | 13.06        | 0.00       | 483.42          | 37.014            | 0.027             |

  

| Names        | total MCF-10A+MDA | miRCancer evidence | Down (Cancer to healthy) | Up (Cancer to healthy) | our finding SF-miRNA | % Consistency within miRCancer |
|--------------|-------------------|--------------------|--------------------------|------------------------|----------------------|--------------------------------|
| hsa-mir-612  | 453.50            | 2                  | 2                        | 0                      | down                 | 1.000                          |
| hsa-mir-5047 | 165.06            | 0                  | 0                        | 0                      | down                 | NA                             |
| hsa-mir-7161 | 75.96             | 0                  | 0                        | 0                      | down                 | NA                             |
| hsa-mir-3687 | 468.72            | 0                  | 0                        | 0                      | down                 | NA                             |
| hsa-mir-3064 | 205.36            | 1                  | 1                        | 0                      | down                 | 1.000                          |
| hsa-mir-1246 | 516.63            | 10                 | 3                        | 7                      | down                 | 0.3                            |
| hsa-mir-7704 | 316.63            | 0                  | 0                        | 0                      | down                 | NA                             |
| hsa-mir-3607 | 61.32             | 2                  | 1                        | 1                      | down                 | 0.500                          |
| hsa-mir-1248 | 72.03             | 0                  | 0                        | 0                      | down                 | NA                             |
| hsa-mir-148a | 51.39             | 52                 | 46                       | 6                      | down                 | 0.885                          |
| hsa-mir-6087 | 6552.40           | 0                  | 0                        | 0                      | down                 | NA                             |
| hsa-mir-1291 | 102.95            | 3                  | 2                        | 1                      | down                 | 0.667                          |
| hsa-mir-622  | 71.40             | 9                  | 7                        | 2                      | down                 | 0.778                          |
| hsa-mir-21   | 1518.07           | 268                | 7                        | 261                    | up                   | 0.026                          |
| hsa-let-7f-1 | 238.72            | 14                 | 14                       | 0                      | up                   | 1                              |
| hsa-let-7f-2 | 205.36            | 14                 | 14                       | 0                      | up                   | 1.000                          |
| hsa-let-7i   | 161.45            | 17                 | 17                       | 0                      | up                   | 1.000                          |
| hsa-mir-221  | 68.21             | 98                 | 9                        | 89                     | up                   | 0.092                          |
| hsa-let-7g   | 190.94            | 20                 | 19                       | 1                      | up                   | 0.950                          |
| hsa-mir-222  | 111.91            | 61                 | 6                        | 55                     | up                   | 0.098                          |
| hsa-mir-30a  | 96.30             | 51                 | 45                       | 6                      | up                   | 0.882                          |
| hsa-mir-100  | 496.48            | 39                 | 34                       | 5                      | up                   | 0.872                          |

At least 75% of evidence must be consistent. Otherwise marked as mixed evidence.

**Table S6. Expression trend for SF-miRNAs in breast cell lines and KM survival plots**

| SF-miRNA<br>(22 genes) | miRNA<br>MDA ><br>MCF10 <sup>a</sup> | HR   | (95%<br>confidenc<br>e interval) | Logrank<br>P-value | Data from<br>KM Survival<br>Plots <sup>b</sup> | Expected<br>change<br>from KM <sup>c</sup> | Inverse<br>trend SF &<br>KM plot |
|------------------------|--------------------------------------|------|----------------------------------|--------------------|------------------------------------------------|--------------------------------------------|----------------------------------|
| hsa-mir-6087           | D                                    | 2    | 1.43-2.79                        | 3.8e-05            | OncomiR                                        | U                                          | Opposite                         |
| hsa-mir-21             | U                                    | 1.63 | 1.16-2.27                        | 0.004              | OncomiR                                        | U                                          | Consistent                       |
| hsa-mir-1246           | D                                    | 1.52 | 1.23-1.87                        | 9e-05              | OncomiR                                        | U                                          | Opposite                         |
| hsa-mir-3687           | D                                    | -    | -                                | -                  | Not listed                                     | -                                          |                                  |
| hsa-mir-100            | U                                    | 0.7  | 0.57-0.85                        | 0.00032            | Tumor sup.                                     | D                                          | Opposite                         |
| hsa-mir-612            | D                                    | 2.06 | 1.48-2.87                        | 1.5e-05            | OncomiR                                        | U                                          | Opposite                         |
| hsa-mir-7704           | D                                    | 2.23 | 1.59-3.12                        | 2.1e-06            | OncomiR                                        | U                                          | Opposite                         |
| hsa-let-7f-1           | U                                    | 0.72 | 0.59-0.87                        | 0.00079            | Tumor sup.                                     | D                                          | Opposite                         |
| hsa-let-7f-2           | U                                    | 0.72 | 0.59-0.87                        | 0.00079            | Tumor sup.                                     | D                                          | Opposite                         |
| hsa-let-7g             | U                                    | 0.72 | 0.59-0.88                        | 0.0014             | Tumor sup.                                     | D                                          | Opposite                         |
| hsa-mir-3064           | D                                    | 1.69 | 1.2-2.39                         | 0.0025             | OncomiR                                        | U                                          | Opposite                         |
| hsa-mir-1291           | D                                    | 1.35 | 0.96-1.9                         | 0.088              | Not significant                                | n.s.                                       |                                  |
| hsa-let-7i             | U                                    | 0.82 | 0.66-1.01                        | 0.065              | Not significant                                | n.s.                                       |                                  |
| hsa-mir-5047           | D                                    | 2.23 | 1.59-3.12                        | 2.1e-06            | OncomiR                                        | U                                          | Opposite                         |
| hsa-mir-622            | D                                    | 2.23 | 1.59-3.13                        | 2e-06              | OncomiR                                        | U                                          | Opposite                         |
| hsa-mir-3607           | D                                    | 0.71 | 0.49-1.04                        | 0.08               | Not significant                                | n.s.                                       |                                  |
| hsa-mir-1248           | D                                    | 1.39 | 0.97-1.99                        | 0.069              | Not significant                                | n.s.                                       |                                  |
| hsa-mir-222            | U                                    | 1.35 | 1.07-1.71                        | 0.013              | OncomiR                                        | U                                          | Consistent                       |
| hsa-mir-30a            | U                                    | 0.75 | 0.61-0.91                        | 0.0041             | Tumor sup.                                     | D                                          | Opposite                         |
| hsa-mir-148a           | D                                    | 0.7  | 0.57-0.86                        | 0.00062            | Tumor sup.                                     | D                                          | Consistent                       |
| hsa-mir-7161           | D                                    | 2.2  | 1.57-3.06                        | 3.3e-06            | OncomiR                                        | U                                          | Opposite                         |
| hsa-mir-221            | U                                    | 1.24 | 0.87-1.76                        | 0.23               | Not significant                                | n.s.                                       |                                  |

<sup>a</sup>Expression of SF-miRNA in MDA-MB-231 relative to MCF-10A cells. Trend is annotated U or D for up and down, respectively. <sup>b</sup>Data from KM survival plot for miRNAs from these cell lines. <sup>c</sup>Expected trend in these cell-lines as extracted from KM survival plots, where oncogenic miRNAs are annotated as U (up) while tumor suppressor miRNAs are expected to go down (D). miRNAs that do not exhibit a significant trend are marked as non-significant (n.s.). SF-miRNAs that result in inverse annotations for the cellular view and patients' survival are marked as opposite.
